# Supplementary material for: A Truncated 14-Amino-Acid Myelin Protein-Zero-Targeting Peptide for Fluorescence-Guided Nerve-Preserving Surgery
Source: MDPI journal article supplement (doi:10.3390/biom13060942), 2023-06-05
Supplement: s1 [file s1]

## Results

### Mass spectrometry

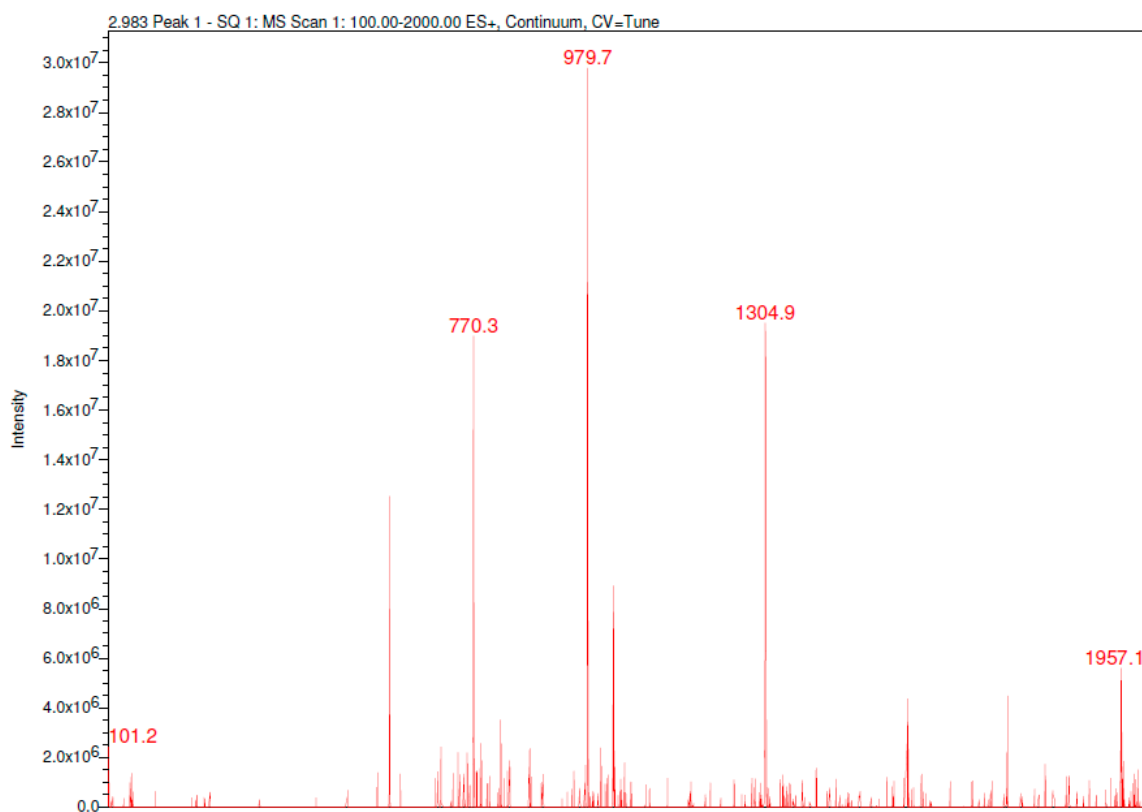

**Figure S1.** Mass spectrum of Cy5-C-P0<sub>101-125</sub>, m/z [M+3H – 979.7].

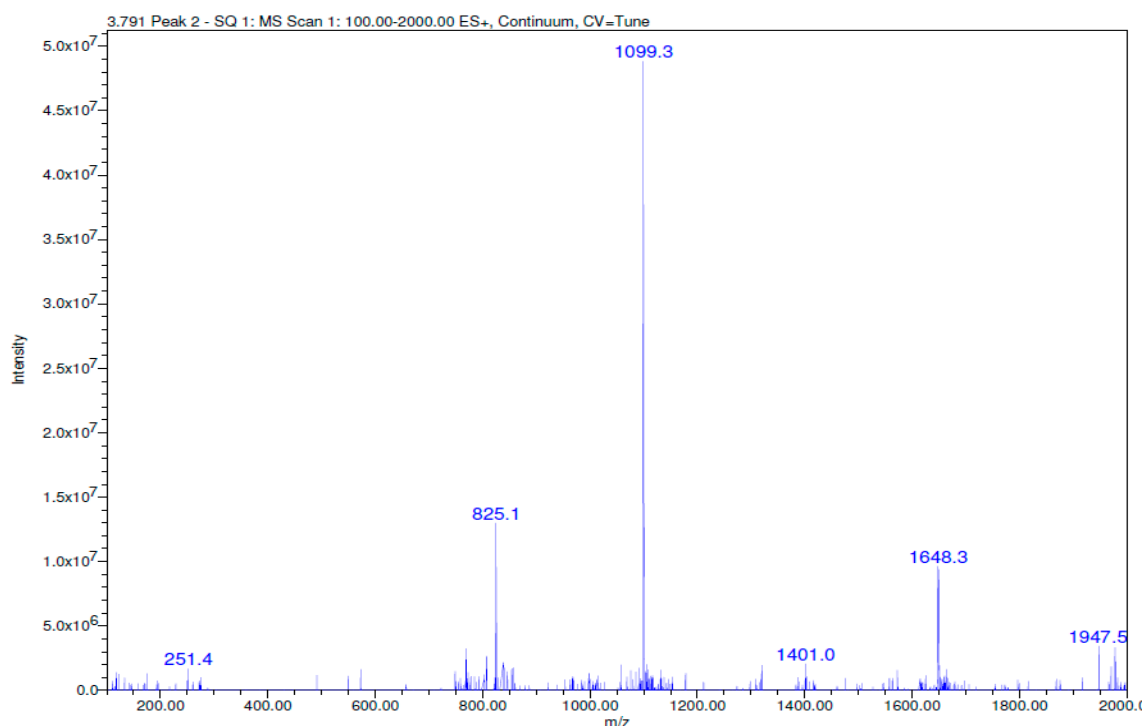

**Figure S2.** Mass spectrum of Cy5-C-P0<sub>101-120</sub>, m/z [M+3H – 1999.3].

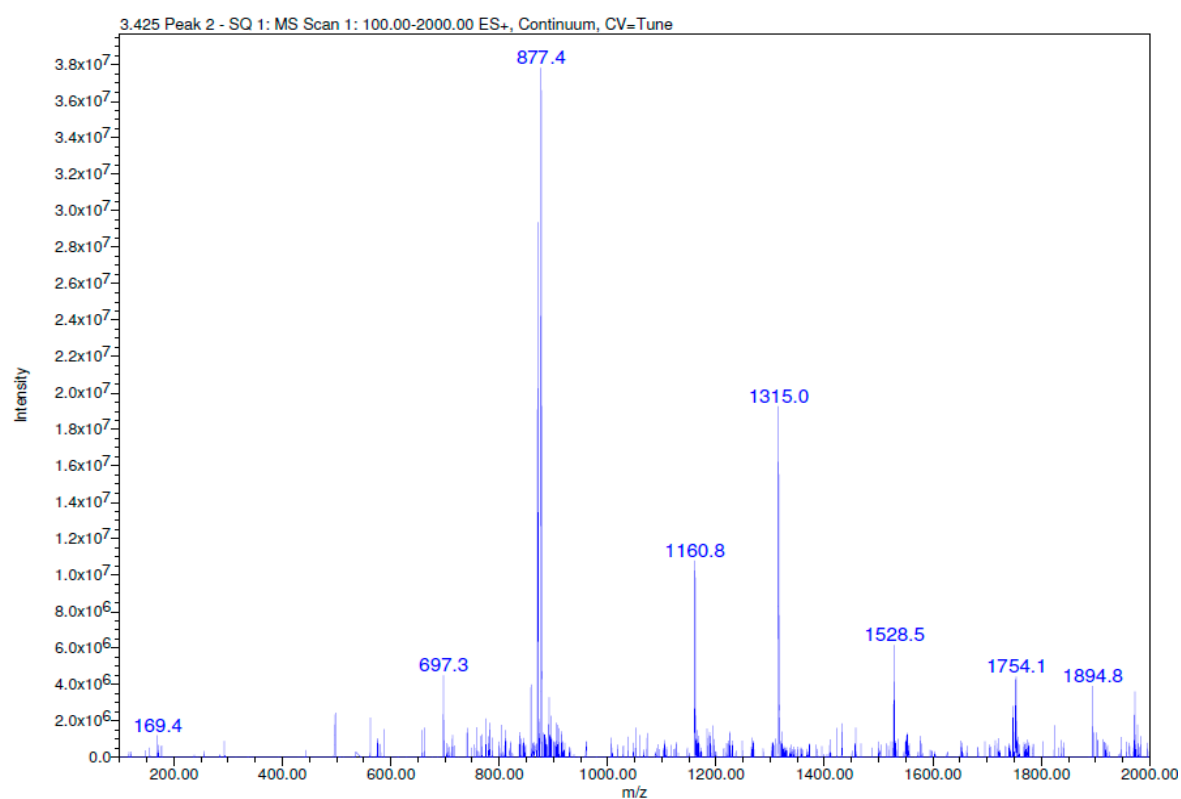

**Figure S3.** Mass spectrum of Cy5-C-P0<sub>101-115</sub>. m/z [M+3H – 877.4].

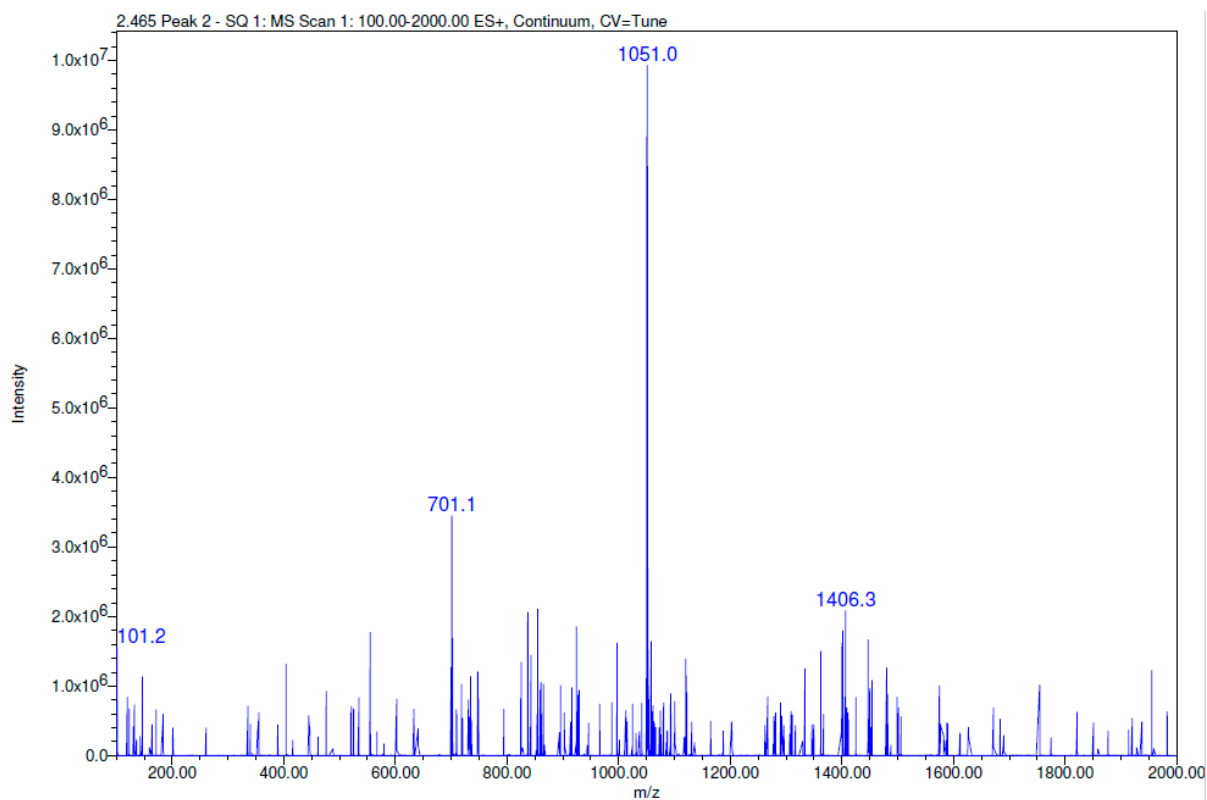

**Figure S4.** Mass spectrum of Cy5-C-P0<sub>101-110</sub>. m/z [M+2H – 1051.0 ].

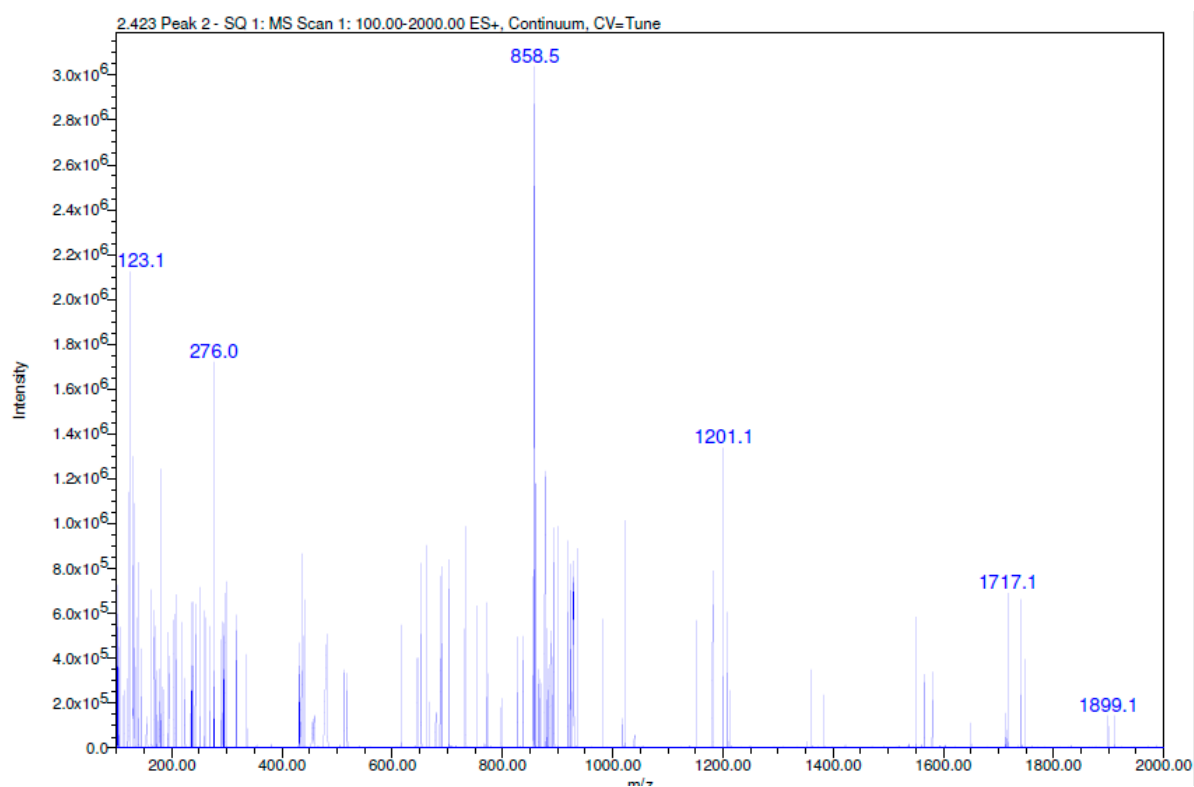

Figure S5. Mass spectrum of Cy5-C-P0101-106.  $m/z$  [ $M+2H - 858.5$ ].

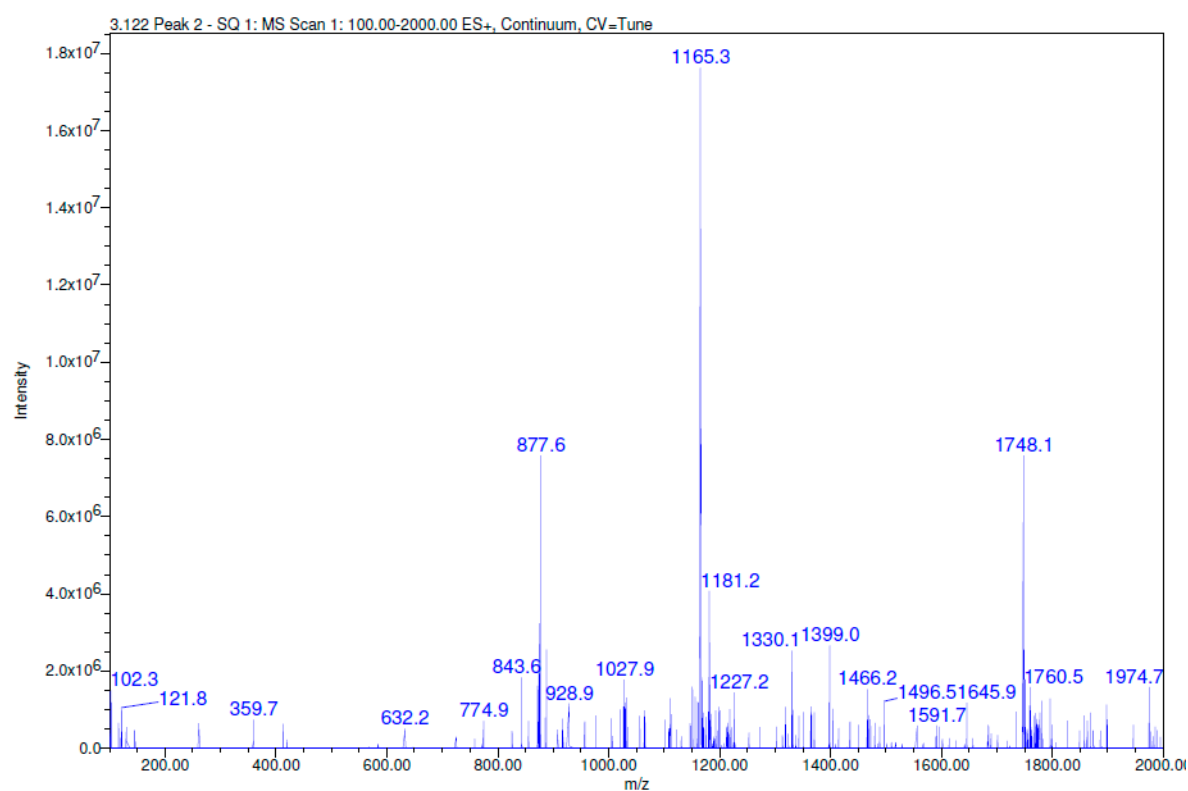

Figure S6. Mass spectrum of Cy5-C-P0105-125.  $m/z$  [ $M+3H+Na^+ - 1165.3$ ].

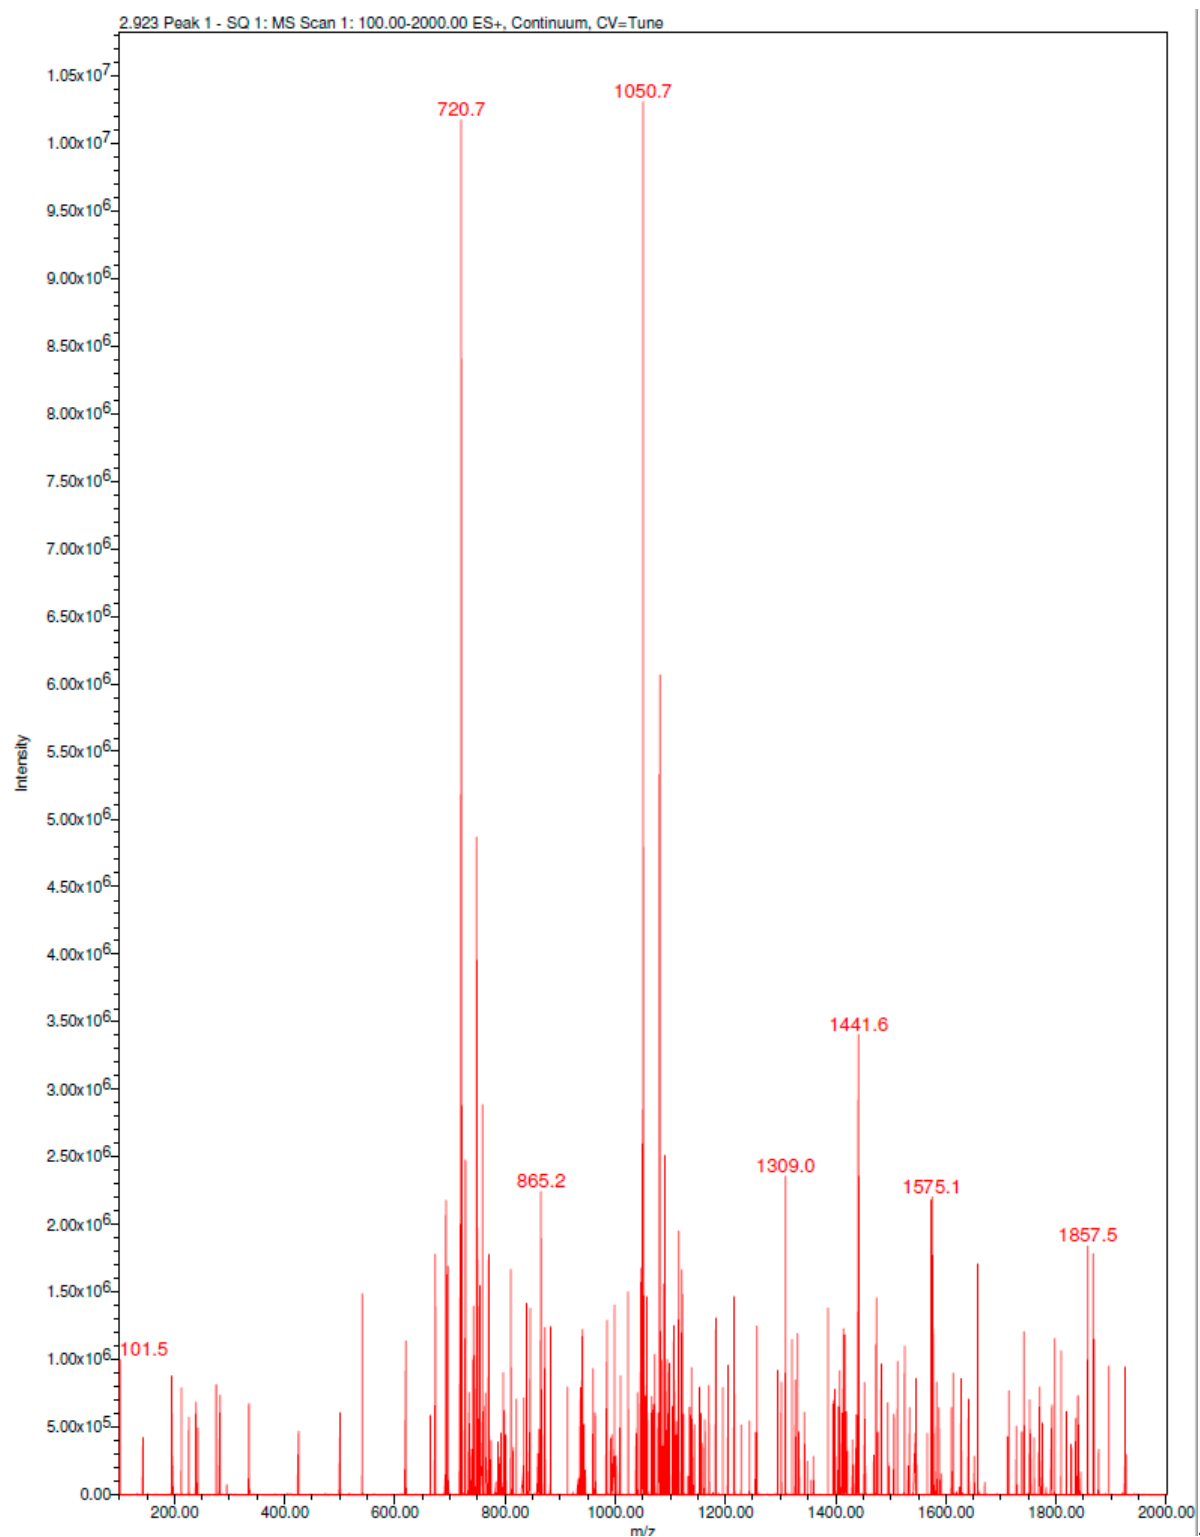

**Figure S7.** Mass spectrum of Cy5-C-P0108-125. m/z [M+2H- 1050.7].

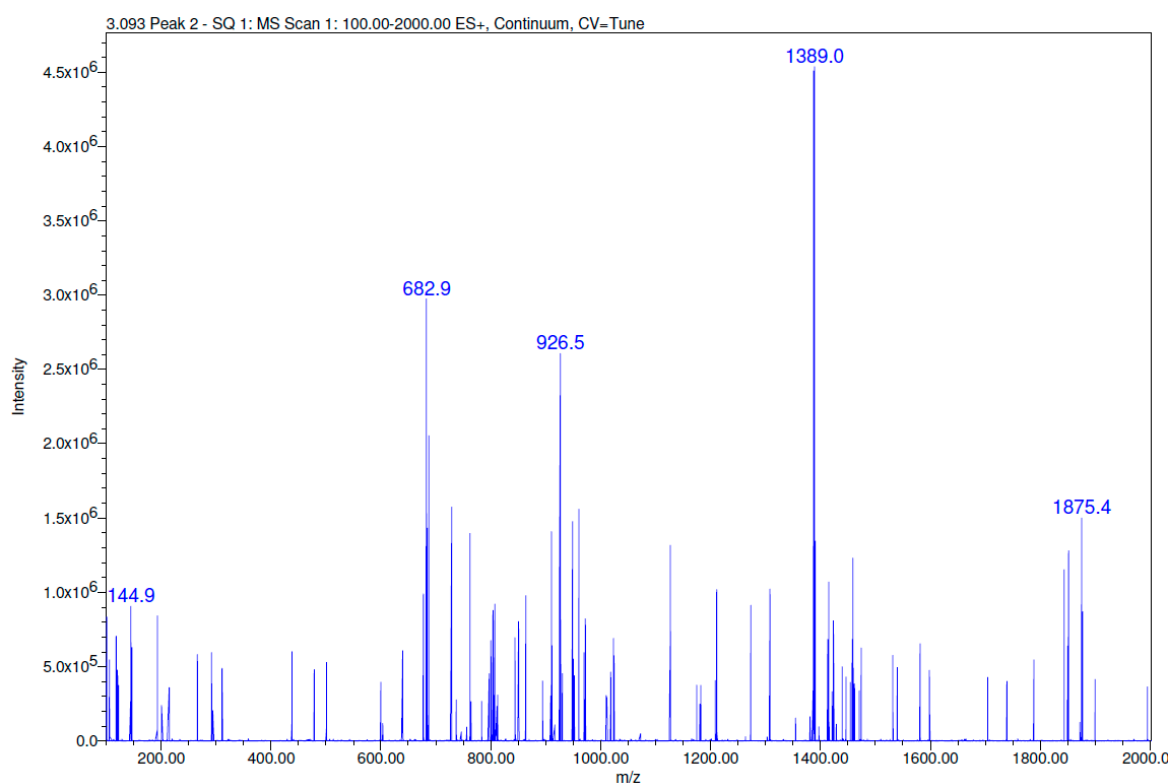

**Figure S8.** Mass spectrum of Cy5-C-P0<sub>112–125</sub>. m/z [M+2H – 1389.0].

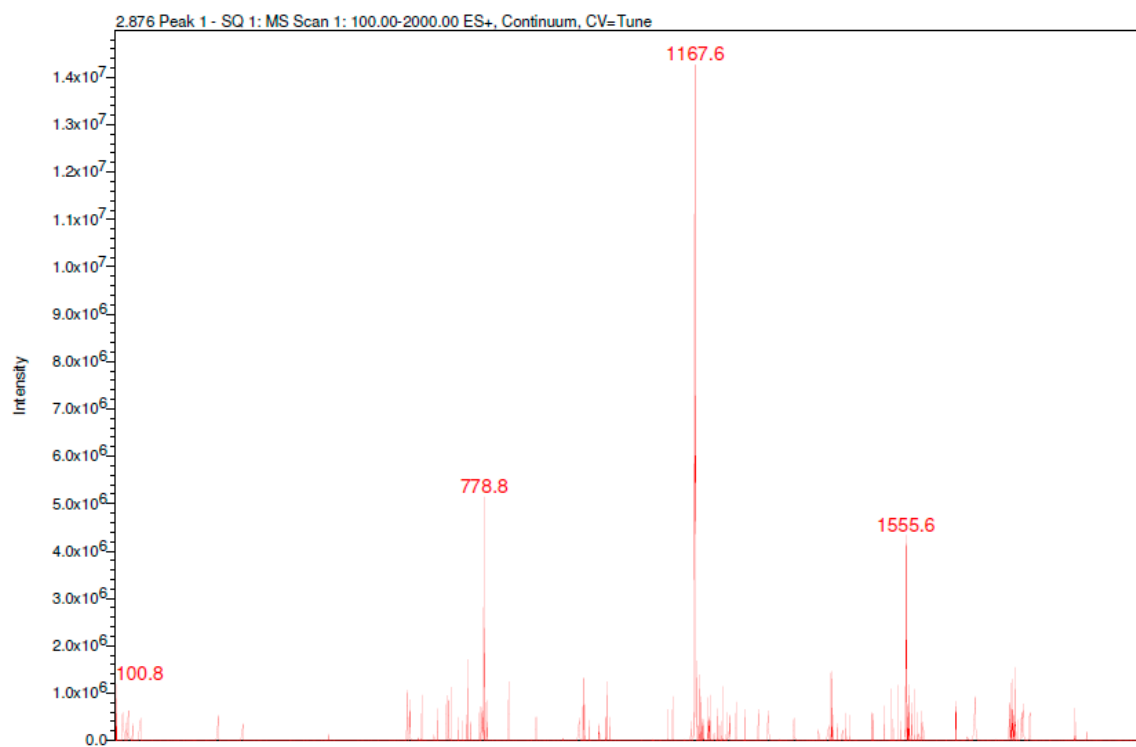

**Figure S9.** Mass spectrum of Cy5-C-P0<sub>116–125</sub>. m/z [M+2H – 1167.6].

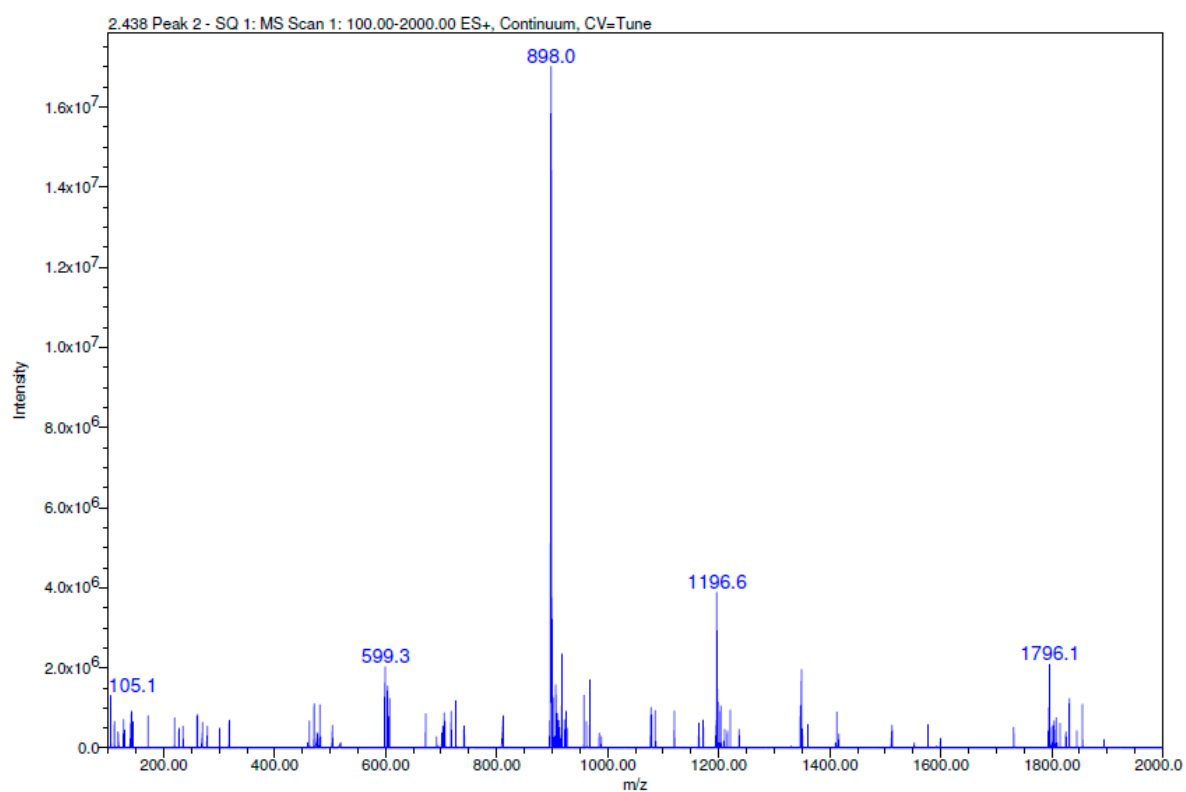

**Figure S10.** Mass spectrum of Cy5-C-P0<sub>120-125</sub>. m/z [M+2H – 898.0].

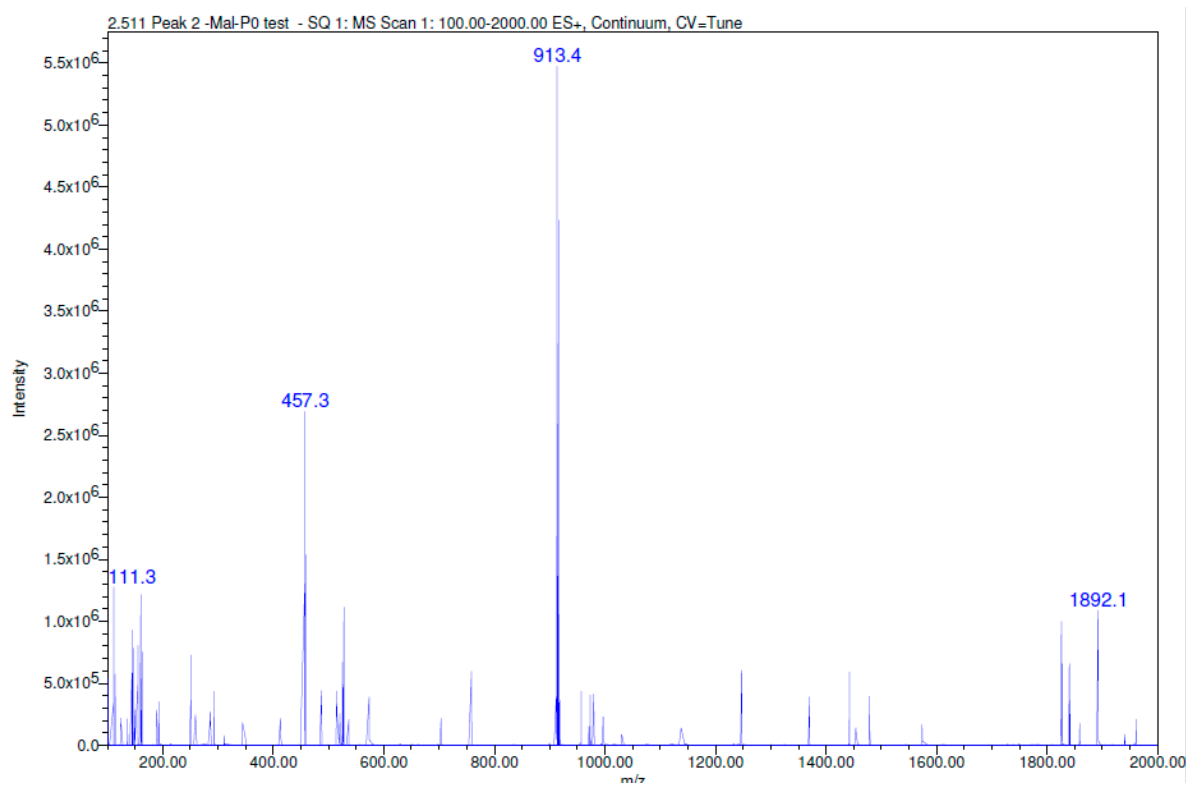

**Figure S11.** Mass spectrum of Maleimide-(SO<sub>3</sub>)Cy5(SO<sub>3</sub>)Sulfonate. m/z [M – 913.4].

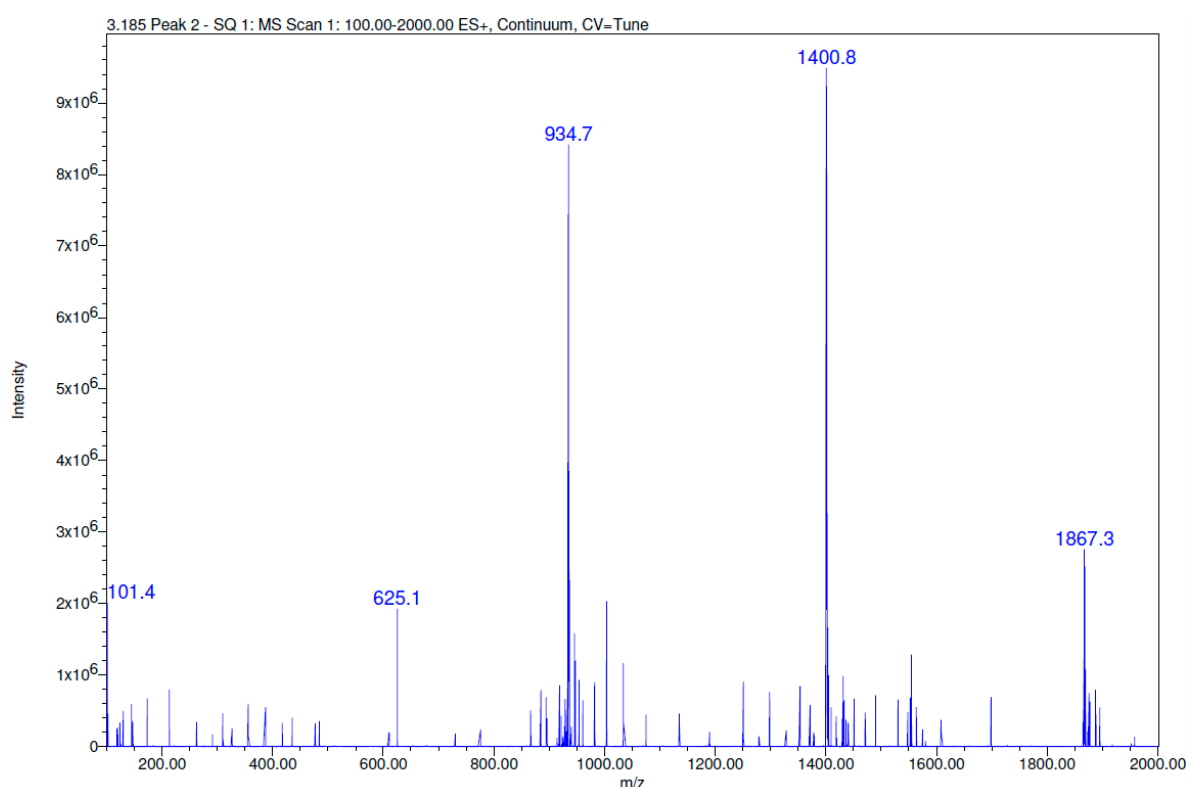

**Figure S12.** Mass spectrum of Cy7-C-P0<sub>112–125</sub>.  $m/z$  [ $M+2H - 1400.8$ ].

#### *Co-localization P0 staining and lysosomal and nuclear control staining*

(3D) surface plot analysis was used to evaluate the localization of the P0-specific staining further (Figure S13). For peptides with a nanomolar affinity (Cy5-P0<sub>101–125</sub>, Cy5-P0<sub>105–125</sub>, Cy5-P0<sub>112–125</sub> and Cy5-P0<sub>116–125</sub>) distribution over the cellular outgrowths was confirmed, with limited overlay with the intracellular lysosomal control staining (overlay Cy5/lysosomes in yellow). No significant co-localization with the nuclear control staining (in blue) was seen. Moreover, increasing affinity (in particular for Cy5-P0<sub>112–125</sub> and Cy5-P0<sub>116–125</sub>) resulted in increased fluorescence peak intensities within the Cy5-related staining pattern.

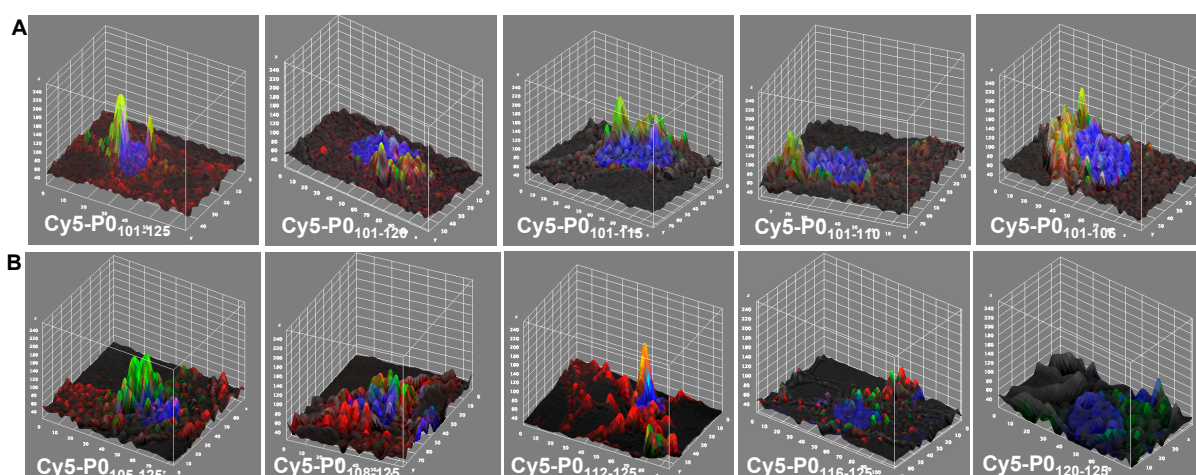

**Figure S13.** Surface plot analysis fluorescence confocal images Surface plot analysis of the staining pattern throughout the cells for A) the C-terminal matrix and B) the N-terminal matrix. Peptide-related staining (Cy5) in red, lysosomes in green and nuclear staining in blue. Yellow line = orientation 3D analysis.

Semi-quantitative assessment of the level of co-staining within the fluorescence confocal images (Table S1) revealed an increasing trend of co-localization of lysosomal intracellular staining with decreasing affinity (Figure 3). Co-localization with the nuclear control staining was comparably low for all compounds.

Semi-quantitative assessment of the co-localization of the P0-related staining of Cy5-P0<sub>101–125</sub> and the intracellular lysosomal (green) was shown to be low for this high affinity peptide (co-localization factor: 0.29; Table S1), while for Cy5-P0<sub>101–120</sub>, Cy5-P0<sub>101–115</sub>, Cy5-P0<sub>101–110</sub> and Cy5-P0<sub>101–106</sub> co-localization of signal was more prominent (co-localization factor of respectively 0.42, 0.59, 0.78 and 0.77). Co-localization with the nuclear (blue) control staining was low for all compounds. The absence of staining of outgrowths combined with the higher level of lysosomal co-localization would therefore suggest that the relatively low Cy5-related fluorescence signal obtained after C-terminal truncation can be contributed to non-specific staining.

Similar to the results obtained C-terminal matrix, the level of staining of the outgrowths was shown to correspond to the level of co-localization with the intracellular control staining/non-specific staining (Table S1). The lysosomal co-localization factor for Cy5-P0<sub>105–125</sub> (0.32), Cy5-P0<sub>108–125</sub> (0.27) and Cy5-P0<sub>112–125</sub> (0.21) was comparable or lower than the original lead compound, whereas a loss in P0-related staining resulted in increased co-localization for Cy5-P0<sub>116–125</sub> (0.40) and Cy5-P0<sub>120–125</sub> (0.39).

**Table S1.** Semi-quantitative assessment of co-localization staining P0 tracers and lysosomal and nuclear control staining.

| Peptide                   | Co-localization factor (scale: 0-1) |                |
|---------------------------|-------------------------------------|----------------|
|                           | Cy5 vs Lysosomes                    | Cy5 vs nucleus |
| Cy5-P0 <sub>101–125</sub> | 0.29 ± 0.03                         | 0.14 ± 0.03    |
| Cy5-P0 <sub>101–120</sub> | 0.42 ± 0.01                         | 0.06 ± 0.02    |
| Cy5-P0 <sub>101–115</sub> | 0.59 ± 0.20                         | 0.78 ± 0.13    |
| Cy5-P0 <sub>101–110</sub> | 0.77 ± 0.15                         | 0.15 ± 0.06    |
| Cy5-P0 <sub>101–106</sub> | 0.77 ± 0.12                         | 0.15 ± 0.06    |
| Cy5-P0 <sub>105–125</sub> | 0.32 ± 0.04                         | 0.07 ± 0.04    |
| Cy5-P0 <sub>108–125</sub> | 0.27 ± 0.11                         | 0.05 ± 0.04    |
| Cy5-P0 <sub>112–125</sub> | 0.21 ± 0.06                         | 0.11 ± 0.01    |
| Cy5-P0 <sub>116–125</sub> | 0.40 ± 0.01                         | 0.04 ± 0.02    |
| Cy5-P0 <sub>120–125</sub> | 0.39 ± 0.06                         | 0.07 ± 0.02    |
